# Supplementary material for: Functional insights into the interplay between DNA interaction and metal coordination in ferric uptake regulators
Source: PubMed Central journal article supplement (PMC5940780; doi:10.1038/s41598-018-25157-6), 2018-05-08
Supplement: 41598_2018_25157_MOESM1_ESM.pdf [file 41598_2018_25157_MOESM1_ESM.pdf]

Supplemental information for the manuscript:

**Functional insights into the interplay between DNA interaction and metal coordination in ferric uptake regulators.**

Sabina Sarvan<sup>1</sup>, François Charih<sup>1</sup>, Momen Askoura<sup>1,2</sup>, James Butcher<sup>1</sup>, Joseph S. Brunzelle<sup>3</sup>,  
Alain Stintzi<sup>1</sup> and Jean-François Couture<sup>1</sup>

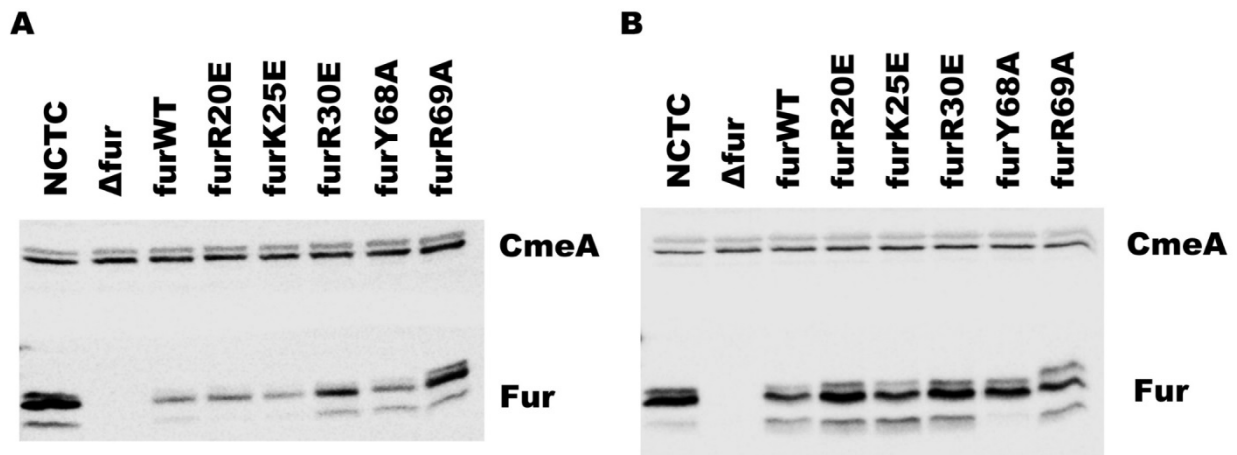

**Figure S1.** Expression of Fur protein in complemented *Campylobacter jejuni fur* mutants in MEM- $\alpha$  medium under iron poor (A) and iron replete (B) conditions. CmeA was used as loading control.

| Table S1. List of primers used for cloning in this study |                        |                                         |               |
|----------------------------------------------------------|------------------------|-----------------------------------------|---------------|
| Name                                                     | Description            | Primer sequence                         | Target Vector |
| Primer 1                                                 | <i>CjFur_Nter_NcoI</i> | AGCAGGATCCATGGGGATGCTGATAGAAAATGTG      | pStrep        |
| Primer 2                                                 | <i>CjFur_Cter_XhoI</i> | CTATCTCGCTCGAGTTATATTTTTACCTTTGCTTTTTGA | pStrep        |
| Primer 3                                                 | <i>CjFur_Nter</i>      | GATTAGATGTCTAGCATGCTAGTGAAAAGTTGCAAGA   | pRRK          |
| Primer 4                                                 | <i>CjFur_Cter</i>      | GGGGAAGCTTTCTAGGCTTTTTCTATTCTTTGCTGCTC  | pRRK          |

| Table S2. List of primers used for EMSA in this study |                                                              |
|-------------------------------------------------------|--------------------------------------------------------------|
| Name                                                  | Primer sequence                                              |
| <i>CjkatA60_For_1588 (Cy5 5')</i>                     | ACTGAATAATTGCATTTTATTGATAATAAATTTCAAATAAATTTAGTTTTTTTATATTA  |
| <i>CjkatA60_Rev_1589 (Cy5 5')</i>                     | TAATATAAAAAAACTAAATTTATTTGAAATTTATTATCAATAAAAATGCAATTATTCAGT |
| <i>Cj1345c_For_1692 (Cy5 5')</i>                      | GGGAAAAGAGCCAAATTTAGGTGTTATCATCAA                            |
| <i>Cj1345c_Rev_1693</i>                               | TTTAACTCCTTAAATACTCTCTTGTTTTAA                               |

**Table S3. List of primers used for site-directed mutagenesis**

| <b>Mutant</b>   | <b>Name</b>                   | <b>Sequence (5'→3')</b>                              |
|-----------------|-------------------------------|------------------------------------------------------|
| <b>Arg14Glu</b> | <i>CjFurR14E-Forward</i>      | GTGGAATATGATGTTTTACTTGAGGAATTTAAAAAATATTAAGACAAGGC   |
|                 | <i>CjFurR14E-Reverse</i>      | GCCTTGCTTAATAATTTTTTAAATTCCTCAAGTAAAACATCATATTCCAC   |
| <b>Lys17Glu</b> | <i>CjFurK17E-Forward</i>      | GATGTTTTACTTGAGAGATTTAAAGAAATATTAAGACAAGGCGGACTTAAA  |
|                 | <i>CjFurK17E-Reverse</i>      | TTAAGTCCGCCTTGCTTAATATTTCTTAAATCTCTCAAGTAAAACATC     |
| <b>Arg20Glu</b> | <i>CjFurR20E-Forward</i>      | CTTGAGAGATTTAAAAAATATTAGAACAAGGCGGACTTAAATATACTAAG   |
|                 | <i>CjFurR20E-Reverse</i>      | CTTAGTATATTTAAGTCCGCCTTGTTCTAATATTTTTTAAATCTCTCAAG   |
| <b>Lys25Glu</b> | <i>CjFurK25E-Forward</i>      | AAAATATTAAGACAAGGCGGACTTGAATATACTAAGCAAAGAGAAGTGCTT  |
|                 | <i>CjFurK25E-Reverse</i>      | AAGCACTTCTCTTTGCTTAGTATATTCAGTCCGCCTTGCTTAATATTTT    |
| <b>Lys28Glu</b> | <i>CjFurK28E-Forward</i>      | AGACAAGGCGGACTTAAATATACTGAACAAAGAGAAGTGCTTTAAAAACT   |
|                 | <i>CjFurK28E-Reverse</i>      | AGTTTTTAAAAGCACTTCTCTTTGTTTCAGTATATTTAAGTCCGCCTTGCT  |
| <b>Arg30Glu</b> | <i>CjFurR30E-Forward</i>      | GGCGGACTTAAATATACTAAGCAAGAAGAAGTGCTTTAAAAACTCTTTAT   |
|                 | <i>CjFurR30E-Reverse</i>      | ATAAAGAGTTTTTAAAAGCACTTCTCTTGCTTAGTATATTTAAGTCCGCC   |
| <b>Tyr68Ala</b> | <i>CjFurY68A-Forward</i>      | TTAAATGTAGGAATTGCAACTGTTGCGCGTACTTTAAATTTGCTTGAAG    |
|                 | <i>CjFurY68A-Reverse</i>      | TTCTTCAAGCAAATTTAAAGTACGCGCAACAGTTGCAATTCCTACATTTAA  |
| <b>Arg69Glu</b> | <i>CjFurR69E-Forward</i>      | AATGTAGGAATTGCAACTGTTTATGAAACTTTAAATTTACTTGAAGAAGCA  |
|                 | <i>CjFurR69E-Reverse</i>      | TGCTTCTTCAAGTAAATTTAAAGTTTCATAAACAGTTGCAATTCCTACATT  |
| <b>ΔS2</b>      | <i>CjFurΔS2-H43A-Forward</i>  | AAAACCTTTTATCACAGTGACTGCCTACACACCCGAAAGTTTATATATG    |
|                 | <i>CjFurΔS2-H43A-Reverse</i>  | CATATATAAAGCTTTCCGGTGTGTAGGCAGTATCACTGTGATAAAGAGTTTT |
|                 | <i>CjFurΔS2-H102A-Forward</i> | CTTGCCAATAAACCTCACCATGATGCCATGATATGTAATAAATTGCGGAAAA |
|                 | <i>CjFurΔS2-H102A-Reverse</i> | TTTCCGCAATTTTACATATCATGGCATCATGGTGAGGTTTATTGGCAAG    |
| <b>ΔS3</b>      | <i>CjFurΔS2-H99A-Forward</i>  | AAATACGAGCTTGCCAATAAACCTGCCCATGATCATATGATATGTAATAAAT |
|                 | <i>CjFurΔS2-H99A-Reverse</i>  | ATTTTACATATCATATGATCATGGCAGGTTTATTGGCAAGCTCGTATTT    |
|                 | <i>CjFurΔS2-H137A-Forward</i> | GAACATGGTTTTAAACTTACAGGGGCTTGATGCAGCTTTATGGTGTGTTGT  |
|                 | <i>CjFurΔS2-H137A-Reverse</i> | ACAAACACCATAAAGCTGCATCAAGGCCCTGTAAGTTTAAAACCATGTTT   |

| <b>Table S4. List of primers used for RT-qPCR analysis</b> |                    |                          |
|------------------------------------------------------------|--------------------|--------------------------|
| <b>Gene</b>                                                | <b>Primer Name</b> | <b>Sequence</b>          |
| <i>cfrA</i>                                                | cfrA_Forward       | TCTATCAGTTTGCGCCATTG     |
|                                                            | cfrA_Reverse       | ATCAACGCCTGGGATATCTG     |
| <i>Cj0948c</i>                                             | Cj0948c_Forward    | ACAAGTGGTTCTGTTGCAGT     |
|                                                            | Cj0948c_Reverse    | TTCATTTCGCCTTTTGTGAGC    |
| <i>Cj1345c</i>                                             | Cj1345c_Forward    | GCGTAGGAGAAAATGGAAAAA    |
|                                                            | Cj1345c_Reverse    | AAAAGCTAAATTTGGAGCCACT   |
| <i>fur</i>                                                 | fur_Forward        | CATTTCTTTTGGTTCAGCAGGT   |
|                                                            | fur_Reverse        | AAGCTGCATCAAATGCCCT      |
| <i>katA</i>                                                | katA_Forward       | CTTTAGTCCAAGCAATATCGTTCC |
|                                                            | katA_Reverse       | CAGCGACATTGTAAGTATTCCTTC |
| <i>slyD</i>                                                | slyD_Forward       | TACGATGAAAATGCCGTTCA     |
|                                                            | slyD_Reverse       | TTCGCCAAAAAGCTCCATAC     |
